# Supplementary material for: A Herbal Formula, Atofreellage, Ameliorates Atopic Dermatitis-Like Skin Lesions in an NC/Nga Mouse Model
Source: PubMed Central journal article supplement (PMC6273903; doi:10.3390/molecules21010035), 2015-12-25
Supplement: molecules-21-00035-s001.pdf [file molecules-21-00035-s001.pdf]

# Supplementary Materials: An Herbal Formula, *Atofreillage*, Ameliorates Atopic Dermatitis-Like Skin Lesions in an NC/Nga Mouse Model

Won-Yong Kim <sup>1</sup>, Hyeong-Geug Kim <sup>1</sup>, Hye-Won Lee <sup>2</sup>, Jin-Seok Lee <sup>1</sup>, Hwi-Jin Im <sup>1</sup>,  
Hyo-Seon Kim <sup>1</sup>, Sung-Bae Lee <sup>1</sup> and Chang-Gue Son <sup>1,\*</sup>

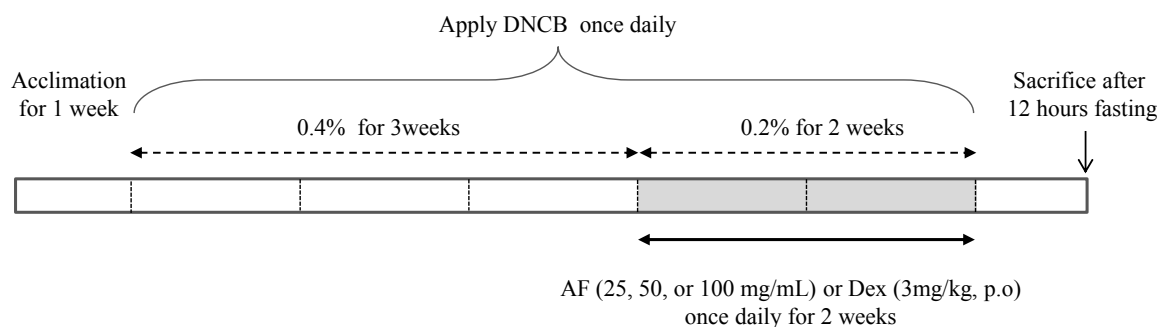

**Figure S1.** Experimental scheme. After 1 week acclimation, all mice were randomly divided into the following six groups ( $n = 8$ ): normal (vehicle without DNCB treatment), control (DNCB treatment without AF or Dex treatment), AF 25 (Atofreillage 25 mg/mL with DNCB treatment), AF 50 (Atofreillage 50 mg/mL with DNCB treatment), AF 100 (Atofreillage 100 mg/mL with DNCB treatment), and Dex (dexamethasone 3 mg/kg with DNCB treatment). To induce AD-like skin inflammation, DNCB applied to mice daily for five weeks on the shaved dorsal skin, except for those of the normal group (0.4% DNCB for three weeks and then 0.2% DNCB for the following two weeks). Atofreillage (200  $\mu$ L of 0, 25, 50, or 100 mg/mL, topically applied to the dorsal skin) or dexamethasone (Dex; 3 mg/kg, orally) was given to the corresponding groups daily for 2 weeks, at which point the mice were treated with 0.2% DNCB.

**Table S1.** Compositional herbs of *Atofreillage*

| Herbal Name         | Scientific Name                                        | Chinese Name  | Relative Amounts |
|---------------------|--------------------------------------------------------|---------------|------------------|
| Galla Rhois         | <i>Rhus javanica</i> Linne                             | Wubeizi       | 1                |
| Kochiae Fructus     | <i>Kochia scoparia</i> Schrader                        | Difuzi        | 1                |
| Cnidi Fructus       | <i>Cnidium monieri</i> Cuss                            | Shengchuangzi | 1                |
| Houttuyniae Herba   | <i>Houttuynia cordata</i> Thunberg                     | Yuxingcao     | 1                |
| Schizonepetae Spica | <i>Schizonepeta tenuifolia</i> Briquet                 | Jingjie       | 1                |
| Sophorae Radix      | <i>Sophora flavescens</i> Aiton                        | Kushen        | 1                |
| Rhei Rhizoma        | <i>Rheum palmatum</i> Linne                            | Dahuang       | 1                |
| Lithospermi Radix   | <i>Lithospermum erythrorhizon</i> Siebold et Zuccarini | Zicao         | 1                |
| Terminaliae Fructus | <i>Terminalia chebula</i> Retzins                      | Jiazi         | 1                |
| Trichosanthis Radix | <i>Trichosanthes kirilowii</i> Maximowicz              | Tianhuafen    | 1                |

Total 1kg (each 100 g of fully dried 10 herbs) was mixed and boiled in 10 L of distilled water for 100 min at 100 °C, and then centrifuged for 30 min at 1500 $\times$  g. The supernatant was lyophilized using a vacuum-freeze-drying system and obtained final extraction (yield 6.5%).
